1    **Timing of increased temperature sensitivity coincides with**  
2    **nervous system development in winter moth embryos**

3    Natalie E. van Dis<sup>1,2</sup>, Maurijn van der Zee<sup>3</sup>, Roelof A. Hut<sup>2</sup>, Bregje Wertheim<sup>2</sup>, Marcel E.  
4    Visser<sup>1,2</sup>

5    <sup>1</sup>Department of Animal Ecology, Netherlands Institute of Ecology (NIOO-KNAW), P.O. Box 50,  
6    6700 AB Wageningen, the Netherlands

7    <sup>2</sup>Groningen Institute for Evolutionary Life Sciences (GELIFES), Groningen University, P.O. Box  
8    11103, 9700 CC Groningen, the Netherlands

9    <sup>3</sup>Institute of Biology, Leiden University, P.O. Box 9505, 2300 RA Leiden, the Netherlands

10

11    **Corresponding author:**    Natalie E. van Dis, [n.vandis@nioo.knaw.nl](mailto:n.vandis@nioo.knaw.nl)

12                                       ORCID ID: 0000-0002-9934-6751

13

14    **Running title:** Shift in egg temperature sensitivity

15

16    **Key words:** temperature sensitivity, insect development, seasonal timing, climate change,

17    adaptation, *Operophtera brumata*

## 18 **Abstract**

19 Climate change is rapidly altering the environment and many species will need to genetically  
20 adapt their seasonal timing to keep up with these changes. Insect development rate is largely  
21 influenced by temperature, but we know little about the mechanisms underlying temperature  
22 sensitivity of development. Here we investigate seasonal timing of egg hatching in the winter  
23 moth, one of the few species which has been found to genetically adapt to climate change,  
24 likely through selection on temperature sensitivity of egg development rate. To study when  
25 during development winter moth embryos are most sensitive to changes in ambient  
26 temperature, we gave eggs an increase or decrease in temperature at different moments  
27 during their development. We measured their developmental progression and timing of egg  
28 hatching, and used fluorescence microscopy to construct a timeline of embryonic  
29 development for the winter moth. We found that egg development rate responded more  
30 strongly to temperature once embryos were in the fully extended germband stage. This is the  
31 phylotypic stage at which all insect embryos have developed a rudimentary nervous system.  
32 Furthermore, at this stage timing of ecdysone signaling determines developmental  
33 progression, which could act as an environment dependent gateway. Intriguingly, this may  
34 suggest that, from the phylotypic stage onward, insect embryos can start to integrate internal  
35 and environmental stimuli to actively regulate important developmental processes. As we  
36 found evidence that there is genetic variation for temperature sensitivity of egg development  
37 rate in our study population, such regulation could be a target of selection imposed by climate  
38 change.

## 39 **Introduction**

40 One of the most pervasive and consistent temperature-related impacts of climate change is  
41 the advancement of seasonal timing. Between 1950 and 2000 alone, spring phenology  
42 advanced for all major species groups by on average 5.1 days per decade (Root et al., 2003).  
43 Often, not all species within a food chain shift their seasonal timing at the same rate  
44 (Kharouba et al., 2018). As a consequence, there is increased selection on timing through the  
45 occurrence of phenological mismatches between two interacting species (Visser et al., 2019).  
46 In the face of increased selection, the speed with which species can genetically adapt their  
47 seasonal timing will determine their capacity to keep up with climate change (Gienapp et al.,  
48 2014; Visser, 2008).

49 To determine how populations can respond to increased selection on seasonal timing, we  
50 need to gain insight into the underlying mechanisms of adaptation to climate change (Visser,  
51 2008). So far, only a few examples of rapid genetic adaptation to climate change have been  
52 uncovered (Scheffers et al., 2016), such as later onset of diapause in the pitcher plant  
53 mosquito, *Wyeomyia smithii* (Bradshaw et al., 2001), earlier onset of flowering in *Brassica*  
54 *rapa* (Franks et al., 2007), and later timing of egg hatching in the winter moth, *Operophtera*  
55 *brumata* (van Asch et al., 2013). Yet little is known about the genetic basis that allowed for  
56 such rapid adaptation of phenological traits (Franks et al., 2012).

57 Seasonal timing is a plastic trait, allowing species to respond to the large variation in  
58 environmental conditions from year to year in order to time key life-cycle events to when  
59 conditions are favorable (Hut et al., 2011). For spring feeding insects, it is crucial to time  
60 their emergence to the phenology of their host plant, as emerging too early will result in  
61 starvation, while emerging too late decreases the nutritional value of their food source (van  
62 Asch & Visser, 2007). This is especially important for winter moths, which have only a

63 single generation per year. Adults emerge and lay eggs in winter, which need to hatch in early  
64 spring for larvae to feed on young leaves until pupation after four to six weeks (Salis et al.,  
65 2017). However, warmer winters advanced winter moth timing of egg hatching more than the  
66 timing of budburst of their host tree, pedunculate oak (*Quercus robur*). The resulting  
67 phenological mismatch of up to 15 days increased the selection for later timing of hatching,  
68 driving the rapid genetic adaptation of the winter moth (van Asch et al., 2013).

69 Winter moth egg hatching is now better timed to oak budburst despite increasingly warmer  
70 winters as eggs hatch later for a given temperature compared to 10 years before (van Asch et  
71 al., 2013). To investigate the genetic basis of the rapid adaptation of egg development to  
72 temperature, we need to know which components of the underlying mechanism were targeted  
73 by selection. As insects are ectotherms, their development rate speeds up with higher  
74 temperatures, whereas lower temperatures may constrain development rate (Nedved, 2009).  
75 Temperature therefore directly influences timing of development completion (Beldade et al.,  
76 2011). However, many insects may be able to regulate the extent to, or the time window in  
77 which the environment can affect their development. One well-known mechanism is  
78 diapause, an epigenetically programmed developmental arrest that allows insects to regulate  
79 the time window when they are most sensitive to changes in ambient temperature (Denlinger,  
80 2002).

81 Previous work has shown that temperature sensitivity of winter moth eggs varies over the  
82 course of development. While timing of egg hatching is affected by temperature fluctuations  
83 during the entire egg development period, temperature has a larger impact later in  
84 development (Salis et al., 2016). This change in temperature sensitivity indicates that winter  
85 moths are especially sensitive to temperature during a specific time window, which forms a  
86 likely target for selection by climate change. However, it is unclear when during embryonic  
87 development this increased temperature sensitivity occurs.

88 Here, we determined at which embryonic stage winter moth egg development rate is most  
89 sensitive to temperature changes. In two split-brood experiments, eggs were given a two  
90 week increase or decrease in temperature at different moments during development, and  
91 subsequent developmental progression and timing of egg hatching were measured. Using  
92 fluorescence microscopy, we constructed a timeline of embryonic development for the winter  
93 moth and tested in which development stages egg development rate responded most strongly  
94 to temperature increases or decreases. From previous work, we expected that temperature  
95 affects egg development rate at every embryonic stage, but with larger effect sizes at later  
96 stages. Knowing at which stages embryos are most sensitive to their environment will be  
97 instrumental to determine potential targets of selection to explain the rapid genetic adaptation  
98 to climate change in the winter moth.

99

## 100 **Methods**

101 We conducted two split-brood experiments to determine the effect of temperature on winter  
102 moth egg developmental rate, and whether this effect changes over the course of development  
103 (following Salis et al., 2016). We collected eggs in 2018 and 2019 from wild winter moth  
104 females caught during the peak of adult emergence in a forest in Doorwerth, the Netherlands  
105 (Catch dates: November 26 and 29, and December 3 2018; November 25, 28 and December  
106 2, 2019). At the start of each experiment (December 14, 2018 and December 13, 2019),  
107 clutches (ranging from 45 to 191 eggs) were placed in climate cabinets set at a constant  
108 baseline temperature of 10°C. Then from the second week onwards, every week four clutches  
109 received a two-week temperature treatment. In 2018-2019, eggs received treatment in weeks  
110 2-8 (28 clutches), and in 2019-2020 eggs received treatment in weeks 2-13 (48 clutches).

111 Clutches were sequentially assigned over treatment weeks such that the catch dates were  
112 spread evenly across experimental groups.

113 In treatment weeks, each clutch was divided into 4-7 sub-clutches of preferably 25 eggs, with  
114 at least 15 eggs. One sub-clutch was sampled before the start of the temperature treatment.  
115 The remaining sub-clutches were divided over three treatments, transferred to either a  
116 warmer (15°C) or a colder treatment (5°C), or remained at baseline temperature (10°C). After  
117 two weeks of treatment, eggs were either placed back at 10°C to record timing of hatching  
118 (2019-2020), or they were sampled to measure the direct effect of temperature changes on  
119 developmental progression (2018-2019: weeks 2-8 and 2019-2020: weeks 9-13). Sampled  
120 eggs were dechorionated with 50% bleach, fixated with 4% formaldehyde, and dehydrated  
121 gradually in methanol (protocol adapted from Brakefield et al., 2009). After storage in 100%  
122 methanol at -20°C, whole eggs were then gradually rehydrated and imaged with fluorescence  
123 microscopy to determine the development stages of the embryos, using 4',6'-diamidino-2-  
124 phenylindole (DAPI) staining which binds to DNA.

125 In 2018-2019, an additional five clutches were kept at 10°C until hatching to check the total  
126 duration of development at this temperature. In 2019-2020, an additional five clutches were  
127 sampled regularly from one week before the start of the experiment until the start of the  
128 treatments in week 2 to define early development stages.

129

## 130 **Statistical analysis**

131 All statistical analyses were performed using R v. 3.6 (R Core Team, 2019). To test for the  
132 effects of temperature treatment on development rate, we used mixed models in a Bayesian  
133 framework. For the effect on timing of egg hatching (the 'hatching dataset'), we used a linear  
134 mixed model with the observed hatching date for each embryo in April days as response

135 variable. For the direct effect on developmental progression (the ‘imaging dataset’), we used  
136 an ordinal mixed model with the observed development stage for each embryo that was  
137 imaged as response variable. The development stages were scored in arbitrary categories,  
138 chosen because they could be readily distinguished by microscopy. Because we only know  
139 the order and direction of development for these categories, a continuation ratio ordinal  
140 model was used for which  $\Pr(Y>i|Y\geq i)$  (Harrell, 2015). This gives the probability in log odds  
141 of falling into a higher level than the one observed, given that an embryo can only stay in a  
142 particular development stage or continue to the next stages. This model does not make any  
143 assumptions about the absolute distance between development stages. We used the R package  
144 *brms* (Bürkner, 2017) to fit both models with random effects.

145 For both models, we used weakly informative normal priors for both intercepts and fixed  
146 effects (mean=0, SD=10) to initialize the models (Gelman et al., 2017). We included  
147 temperature treatment and treatment week as fixed effects, as well as the interaction between  
148 the two. Treatment week was included as a factor, as we are interested in the differences in  
149 treatment effects between weeks. Including such group-level predictors addresses the  
150 multiple comparisons problem in Bayesian analysis (Gelman et al., 2012). As covariates, we  
151 included female catch site and date. Catch tree was included as a random effect, as winter  
152 moths can show local adaptation (Dongen et al., 1997). We also included a random intercept  
153 for clutch as well as a random slope for treatment per clutch, as the winter moth’s genetic  
154 adaptation to climate change suggests genetic variation in both baseline development speed  
155 and temperature sensitivity. Removing the covariates and the tree the female was caught on  
156 as random effect did not diminish model fit (Watanabe–Akaike information criterion  
157 expected log pointwise predictive density difference (WAIC elpd\_diff)=+6.4, SE=2.6 and  
158 WAIC elpd\_diff=+0.8, SE=0.2) nor did it affect the estimates for temperature treatment and  
159 treatment week (Fig. S1 and S2). Therefore, we decided to use these more parsimonious

160 models as our final models. Posteriors for all model parameters converged ( $R_{\text{hat}}=1.00$ ) with  
161 effective sample sizes of  $>2000$  (Table S1-2).

162 As the effect of temperature on development speed in insect embryology is well established  
163 to be directional (Nedved, 2009), we used one-tailed tests at a significance level of  $\alpha=0.05$ .

164 To test our hypothesis that differences in development rate between warm and cold  
165 treatments are present after every treatment period, we compared treatments within each  
166 treatment week. To determine when the effect of temperature on winter moth egg  
167 developmental rate changes over the course of development, we compared the effect size of  
168 the warm and the cold treatments relative to the constant baseline between treatment weeks.

169

## 170 **Results**

### 171 **Timeline of winter moth embryonic development**

172 Given the weekly sampling of eggs, we constructed a timeline for winter moth embryonic  
173 development at a constant  $10^{\circ}\text{C}$ . We used the timeline of a related species from the same  
174 Geometridae subfamily as the winter moth as guidance (Wall, 1973) and defined 20  
175 development stages, which were easily distinguishable with whole-egg fluorescence  
176 microscopy using DAPI staining (Figure 1). Recently laid eggs in stage 1 were still green, but  
177 turned orange over the course of a week. On average, embryos took approximately 14 weeks  
178 at a constant  $10^{\circ}\text{C}$  to complete embryonic development (Fig. S3).

179 Figure 1 depicts a typical image for each of the 20 development stages we identified for  
180 winter moth embryonic development. The blastoderm stage was defined as stage 1. At stage  
181 2, the orange-pigmented serosa migrated over the germ rudiment, evidenced by the large  
182 serosal nuclei overlying the denser cells of the germ rudiment. This germ rudiment further  
183 condensed into a cup shape (stage 3), although not as extremely as observed in *Chesias*  
184 *legatella* (Wall, 1973), and at the borders of the germ rudiment a thicker rim of amniotic cells



185 formed (Gaumont, 1950). As the embryos started to elongate into a germband, the head lobes  
186 started to form (stage 4), and the formation of both head and tail pouches (Wall, 1973)  
187 became prominently visible in stage 5. Subsequently, the germ band sunk deep into the yolk  
188 and the head and tail pouches reduced in size (stage 6). As embryos elongated further, head  
189 and tail nearly touched each other (stage 7), but no constrictions in the germ band were  
190 visible, until segmentation of the anterior segments started (stage 8). As segmentation  
191 continued towards the tail and completed (stage 9), the germband reached its maximum  
192 length, and thoracic segmentation became more refined. At this stage, the brain, central nerve  
193 chord, and abdominal ganglia have formed, according to Gaumont (1950). In stage 10, head  
194 and thorax appendages started to arise, with embryos still having a relatively thin posterior  
195 abdomen. The head appendages then became more rod shaped and started to fuse together  
196 (stage 11), while the thoracic legs grew longer, and the posterior abdomen thicker. At stage  
197 12, we observed germband retraction, with embryos in a C-shape position and the head parts  
198 almost completely fused together. Then the tail moved away from the head until embryos  
199 flipped their tails towards the ventral side at the start of revolution (stage 13: katatrepsis,  
200 Panfilio, 2008). Embryos elongated further with the tail moving towards the thorax (stage  
201 14), until they were completely in a U-shape (stage 15). The back of the head smoothed out,  
202 and the mouth became directed downwards, while embryos increased in length (stage 16) and  
203 we started observing a clasper at the end of the tail. Pigmentation started first at the eye and  
204 jaw (stage 17), and where before embryos had had an open back, from this point forward we  
205 observed the progression of dorsal closure. As pigmentation continued, DAPI penetration  
206 reduced, and pigmentation showed as black areas that did not reflect light. A black cap  
207 formed on the head of the embryos, and sclerotization of the body started (stage 18). In this  
208 stage, embryos went through a final elongation with the head tucked in towards the center of  
209 the egg. With pigmentation completed (stage 19), fully grown caterpillars could be observed

210 with a light microscope lying in a transparent chorion, which always burst during the fixation  
211 process. The last stage (stage 20) we defined as the moment of egg hatching.

212 Ultimately, we are interested in whether the effect of temperature on development rate  
213 changes during development. To aid in the interpretation of the direct effect of temperature  
214 on developmental progression and to be able to compare it to the effect on timing of hatching,  
215 we linearized the development timeline at a constant 10°C with a locally estimated scatter  
216 plot smoothing (loess) model. This allowed us to translate the observed development stages  
217 into time units, expressed as the number of days at a constant 10°C (Fig. S3).

218

## 219 Temperature effect on egg development rate

220 In both experimental years, egg development rate responded more strongly to temperature  
221 once embryos had passed stage 9, in which they finish segmentation (Figure 1 and 2). We  
222 observed this change in temperature sensitivity in response to two weeks of temperature  
223 treatment both in developmental progression (Figure 2A) and at timing of hatching (Figure  
224 2B).

225 For developmental progression, we found that in every treatment week, embryos from each  
226 treatment group progressed in development compared to the development stage observed  
227 before treatment (Table 1: estimated mean probabilities are all positive log odds, Fig. S4).

228 The probability of observing a later stage of development was always significantly higher for  
229 embryos in the warm treatment compared to the cold and baseline treatments after two weeks  
230 (Table 1: 15 vs. 5°C,  $P < 0.05$ , Table S3). Thus, eggs of the warm treatment were always  
231 significantly further along in development. When we compared the cold treatment to the  
232 constant baseline, we only observed a significant delay in development from treatment week  
233 6 onwards (Table 1: 5 vs. 10°C,  $P < 0.05$ , Table S3), when embryos received treatment after

234 they had passed stage 9: the completion of segmentation (Figure 1). At the time of  
235 segmentation, the effect size of temperature treatment significantly increased when compared  
236 between weeks (Table 1, Fig. S5A and S6-7, Table S5-6,  $P < 0.05$ ). When we translated the  
237 effect size in each week to number of days at 10°C (Fig. S3), we observed that a warm  
238 treatment administered after segmentation led to an advance of 9-12 days compared to  
239 development at a constant 10°C, while this advance was only 4-6 days before segmentation  
240 (Figure 2A). An increase in the effect size of the cold treatment also became apparent at this  
241 stage: once embryos had finished segmentation a cold treatment of two weeks resulted in a  
242 delay of 6-10 days compared to only 0-2 days before (Figure 2A).

243 A similar shift in temperature sensitivity was observed at timing of hatching (Figure 2B). All  
244 treatments significantly differed from each other regardless of the moment at which  
245 temperature treatment was administered during development (Table 2: effect size,  $P < 0.05$ ,  
246 Table S4), confirming that winter moth embryonic developmental rate is sensitive to  
247 temperature during the entire egg stage. Embryos that received a warm treatment always  
248 hatched earlier compared to development at a constant 10°C and to the cold treatment (Table  
249 2: 15 vs. 10°C and 15 vs. 5°C, negative effect sizes), while embryos that received a cold  
250 treatment always hatched later (Table 2: 5 vs. 10°C positive effect sizes). However, the  
251 magnitude of the temperature effect on timing of hatching changed over the course of  
252 development. The effect size of temperature treatment in the weeks after which embryos had  
253 finished segmentation significantly increased compared to the weeks before (Table 2, Fig.  
254 S5B and S8-9, Table S7-8,  $P < 0.05$ ). For the warm treatment, embryos that were moved to  
255 15°C when they had passed stage 9 were 8-10 days advanced compared to hatching at a  
256 constant 10°C, while they were only 5-8 days advanced when they were moved to 15°C  
257 earlier in development (Figure 2B). Similarly, the largest delay in hatching after a cold  
258 treatment was observed for embryos that were moved to 5°C after they passed stage 9, going

259 from a 3-6 days delay to a 7-10 days delay compared to hatching at a constant 10°C (Figure  
260 2B).

261

## 262 Variation in development speed and temperature sensitivity

263 There was high between-clutch variation in development speed. At a constant 10°C, the  
264 earliest clutch and the latest clutch hatched 18 days apart (mean=April day -9.71, SD=8.07).  
265 Moreover, there was high within-clutch variation with on average an IQR of 7.34 days  
266 within-clutch (SD=3.73). This high variation was also visible in the range of different  
267 development stages observed at each time point (Fig. S3).

268 The high variation in hatch dates and development stages could not solely be explained by  
269 the temperature environment. The random intercept for clutch as well as the random slope for  
270 treatment per clutch were significantly different from zero in both models of egg  
271 development rate (Table S1 and S2,  $P < 0.05$ ). This means that both baseline development  
272 speed and temperature sensitivity depended on clutch and probably had a genetic basis.

273

## 274 Discussion

275 Temperature sensitivity of winter moth egg development rate was previously found to change  
276 over the course of development. The mechanism behind this change in temperature  
277 sensitivity represents a potential target of selection on seasonal timing imposed by climate  
278 change. To gain insight into the underlying mechanism, we investigated at which embryonic  
279 stage winter moth egg development rate is most sensitive to changes in temperature. We  
280 found a switch from weak to strong temperature sensitivity once embryos had finished  
281 segmentation and were in the fully extended germband stage.

282 As ectotherms, insect development rate is largely dependent on ambient temperature  
283 (Nedved, 2009). This is also reflected in our results: embryos that had received a warm  
284 treatment for two weeks were always advanced in development and hatched earlier, while  
285 embryos that received a cold treatment were always delayed compared to the control. This  
286 seems to suggest that winter moth embryos do not have egg diapause. Interestingly, winter  
287 moth embryos did condense into a cup-shape, which resembles the pyriform embryonic stage  
288 observed in many Lepidopteran species with egg diapause (Behrens, 2012). Indeed, in *C.*  
289 *legatella* embryos enter diapause in this cup-shaped stage (Wall, 1973). However, the  
290 condensation was less extreme in the winter moth and embryos had formed a germband  
291 within two weeks at a constant 10°C. In contrast, diapausing *C. legatella* embryos go through  
292 a period of stasis before germband development resumes after a prolonged period of cool  
293 temperatures (Wall, 1974).

294 The extent to which winter moth development rate was affected by changes in temperature  
295 shifted over the course of development, as previously found by Salis et al. (2016). Our results  
296 indicate that winter moth embryonic development can be divided into two phases of  
297 temperature sensitivity. In both experiments, the switch from weak to strong temperature  
298 sensitivity occurred once embryos were in the fully extended germband stage. The switch  
299 seems to have occurred progressively rather than abruptly, with a strong increase in  
300 sensitivity over the course of two to three weeks, followed by a gradual approach towards a  
301 maximum advancement or delay of 10-12 days, which is close to the two-week treatment  
302 duration we used. This graduality may either reflect the underlying regulating mechanism of  
303 temperature sensitivity or it may be due to the large variation in development rate both within  
304 and between clutches.

305 The fully extended germband stage, where we observed the switch from weak to strong  
306 temperature sensitivity, coincides with two developmental events. Firstly, it coincides with

307 the development of a rudimentary nervous system in the winter moth (Gaumont, 1950).  
308 Interestingly, this is the phylotypic stage at which all insect embryos resemble each other and  
309 have developed a rudimentary nervous system (Sander, 1983; Slack, 2003). This represents  
310 the intriguing possibility that insect embryos can start to integrate internal and environmental  
311 stimuli to actively regulate important developmental processes. An important aspect for such  
312 regulation might be the development of thermosensory neurons, allowing embryos to start  
313 sensing ambient temperatures apart from the direct effects of temperature on enzyme kinetics.  
314 For example in *Drosophila*, mutants that lack thermosensory neurons are unable to  
315 behaviorally respond to changes in temperature, which implies the involvement of cognitive  
316 control (Soto-Padilla et al., 2018).

317 The second major developmental event in the fully extended germband phase is a peak in the  
318 hormone ecdysone, as has been shown in *Drosophila* (Kozlova et al., 2003). Ecdysone is a  
319 key life-history hormone well known for its regulatory role in timing of insect metamorphosis  
320 (Adams, 2009). For example, diapause termination involves an increase in sensitivity to  
321 ecdysteroids by the upregulation of ecdysone receptors (Denlinger, 2002) and ecdysone  
322 temporal expression also seems to play an essential role in insect embryonic development  
323 (Buszczak et al., 1999). If the temporal pattern of ecdysone signaling is dependent on the  
324 environment, this signaling could act as a gateway during development as it does in the  
325 developmental plasticity of *Bicyclus anyana*. In this species, adult seasonal morphotype was  
326 found to depend on ambient temperatures experienced during caterpillar development, with  
327 the timing of the peak in ecdysteroid hormones occurring earlier when individuals were  
328 placed in warmer temperatures (Oostra et al., 2011).

329 Rapid climate change results in pervasive changes in local environments, driving shifts in the  
330 seasonal timing of many species (Root et al., 2003). This phenotypic plasticity alone is  
331 expected not to be sufficient to deal with climate change (Gienapp et al., 2014), as was the

332 case for the winter moth (van Asch et al., 2013). As such, environment dependent regulation  
333 of the timing of development represents a likely target of selection in the face of climate  
334 change. Gateway mechanisms might be especially important for rapid genetic adaptation. For  
335 example in the pitcher plant mosquito, climate change resulted in a genetic shift in the  
336 threshold for seasonal timing: critical photoperiods for diapause induction shortened  
337 (Bradshaw et al., 2001).

338 The genetic adaptation of the winter moth to climate change resulted in later egg hatching  
339 despite warmer winters (van Asch et al., 2013). Our analysis indicated that both baseline  
340 development speed and temperature sensitivity depended on clutch. As the response of egg  
341 hatching to temperature was previously found to be highly heritable ( $h^2=0.63-0.94$ , van Asch  
342 et al., 2007), this likely points to genetic variation present in our study population for these  
343 traits. This is in line with van Asch et al. (2013) who find that the winter moth genetically  
344 adapted its temperature dependent development rate in response to climate change.

345 The switch in temperature sensitivity at the time of nervous system development we find  
346 here, as well as the presence of genetic variation in temperature sensitivity in our population,  
347 can guide future studies on when to look at genes involved in the regulation of developmental  
348 timing. We have few examples of species which have been found to genetically adapt to  
349 climate change (Scheffers et al., 2016). Characterizing the genetic adaptation in wild  
350 populations like the winter moth will help in determining the factors that influence the  
351 evolutionary potential of wild insect populations. Knowing the processes and the genes  
352 involved in adaptation will be essential for the assessment of vulnerability to climate change.  
353 Populations that show genetic variation in genes relevant for climate change adaptation are  
354 predicted to be better able to keep up with the high rate of global warming, making them less  
355 vulnerable to extinction (Norberg et al., 2012).

356

## 357 [Acknowledgements](#)

358 We thank B. van Lith, P. de Vries, C. Mateman, and A. Pijl for their technical support and  
359 help with lab work during the two experiments.

360

## 361 [References](#)

362 Adams, M. E. (2009). Ecdysteroids. In *Encyclopedia of Insects* (pp. 308–310).

363 Behrens, W. (2012). Environmental Aspects of Insect Dormancy. In K. H. Hoffmann (Ed.),  
364 *Environmental Physiology and Biochemistry of Insects* (pp. 68–93). Springer Science &  
365 Business Media.

366 Beldade, P., Mateus, A. R. A., & Keller, R. A. (2011). Evolution and molecular mechanisms  
367 of adaptive developmental plasticity. *Molecular Ecology*, *20*(7), 1347–1363.  
368 <https://doi.org/10.1111/j.1365-294X.2011.05016.x>

369 Bradshaw, W. E., & Holzapfel, C. M. (2001). Genetic shift in photoperiodic response  
370 correlated with global warming. *Proceedings of the National Academy of Sciences*,  
371 *98*(25), 14509–14511. <https://doi.org/10.1073/pnas.241391498>

372 Brakefield, P. M., Zwaan, B. J., & Beldade, P. (2009). The African Butterfly *Bicyclus*  
373 *anyana*. In *Emerging Model Organisms: A Laboratory Manual vol.1* (pp. 291–330).  
374 <https://doi.org/10.1101/pdb.prot5213>

375 Bürkner, P.-C. (2017). brms: An R Package for Bayesian Multilevel Models Using Stan.  
376 *Journal of Statistical Software*, *80*(1), 1–28. <https://doi.org/doi:10.18637/jss.v080.i01>

377 Buszczak, M., Freeman, M. R. ., Carlson, J. R., Bender, M., Cooley, L., & Segraves, W. A.  
378 (1999). Steroid response genes in oogenesis. *Development*, *126*, 4581–4589.



- 379 Denlinger, D. L. (2002). Regulation of Diapause. *Annu. Rev. Entomol*, *47*, 93–122.
- 380 Dongen, S. Van, Backeljau, T., Matthysen, E., & Dhondt, A. A. (1997). Synchronization of  
381 hatching date with budburst of individual host trees (*Quercus robur*) in the winter moth  
382 (*Operophtera brumata*) and its fitness consequences. *Journal of Animal Ecology*, *66*,  
383 113–121.
- 384 Franks, S. J., & Hoffmann, A. A. (2012). Genetics of Climate Change Adaptation. *Annual*  
385 *Review of Genetics*, *46*(1), 185–208. [https://doi.org/10.1146/annurev-genet-110711-](https://doi.org/10.1146/annurev-genet-110711-155511)  
386 155511
- 387 Franks, S. J., Sim, S., & Weis, A. E. (2007). Rapid evolution of flowering time by an annual  
388 plant in response to a climate fluctuation. *Proceedings of the National Academy of*  
389 *Sciences of the United States of America*, *104*(4), 1278–1282.  
390 <https://doi.org/10.1073/pnas.0608379104>
- 391 Gaumont, R. (1950). Etudes embryologiques sur l’oeuf de cheimatobie *Operophtera brumata*  
392 L., Lepidoptère Geometridae. *Annls Inst. Natn. Rech. Agron., Paris (C)*(1), 253–273.
- 393 Gelman, A., Hill, J., & Yajima, M. (2012). Why We (Usually) Don’t Have to Worry About  
394 Multiple Comparisons. *Journal of Research on Educational Effectiveness*, *5*, 189–211.  
395 <https://doi.org/10.1080/19345747.2011.618213>
- 396 Gelman, A., Simpson, D., & Betancourt, M. (2017). The prior can often only be understood  
397 in the context of the likelihood. *Entropy*, *19*(10), 1–13.  
398 <https://doi.org/10.3390/e19100555>
- 399 Gienapp, P., Reed, T. E., & Visser, M. E. (2014). Why climate change will invariably alter  
400 selection pressures on phenology. *Proc. R. Soc. B*, *281*, 20141611.  
401 <https://doi.org/10.1098/rspb.2014.1611>

- 402 Harrell, F. E. (2015). *Regression Modeling Strategies* (2nd ed.). [https://doi.org/10.1007/978-](https://doi.org/10.1007/978-3-319-19425-7)  
403 3-319-19425-7
- 404 Hut, R. A., & Beersma, D. G. M. (2011). Evolution of time-keeping mechanisms: early  
405 emergence and adaptation to photoperiod. *Proc. R. Soc. B*, 366, 2141–2154.  
406 <https://doi.org/10.1098/rstb.2010.0409>
- 407 Kharouba, H. M., Ehrlén, J., Gelman, A., Bolmgren, K., Allen, J. M., Travers, S. E., &  
408 Wolkovich, E. M. (2018). Global shifts in the phenological synchrony of species  
409 interactions over recent decades. *Proceedings of the National Academy of Sciences*,  
410 115(20), 5211–5216. <https://doi.org/10.1073/pnas.1714511115>
- 411 Kozlova, T., & Thummel, C. S. (2003). Essential roles for ecdysone signaling during  
412 *Drosophila* mid-embryonic development. *Science*, 301(5641), 1911–1914.  
413 <https://doi.org/10.1126/science.1087419>
- 414 Nedved, O. (2009). Temperature, Effects on Development and Growth. In *Encyclopedia of*  
415 *Insects* (pp. 990–993). <https://doi.org/10.1016/B978-0-12-374144-8.00261-7>
- 416 Norberg, J., Urban, M. C., Vellend, M., Klausmeier, C. A., & Loeuille, N. (2012). Eco-  
417 evolutionary responses of biodiversity to climate change. *Nature Climate Change*, 2(10),  
418 747–751. <https://doi.org/10.1038/nclimate1588>
- 419 Oostra, V., de Jong, M. A., Invergo, B. M., Kesbeke, F., Wende, F., Brakefield, P. M., &  
420 Zwaan, B. J. (2011). Translating environmental gradients into discontinuous reaction  
421 norms via hormone signalling in a polyphenic butterfly. *Proc. R. Soc. B*, 278, 789–797.  
422 <https://doi.org/10.1098/rspb.2010.1560>
- 423 Panfilio, K. A. (2008). Extraembryonic development in insects and the acrobatics of  
424 blastokinesis. *Developmental Biology*, 313(2), 471–491.

- 425 <https://doi.org/10.1016/j.ydbio.2007.11.004>
- 426 R Core Team. (2019). *R: A language and environment for statistical computing*. Retrieved  
427 from <https://www.r-project.org/>
- 428 Root, T., Price, J., Hall, K., & Schneider, S. (2003). Fingerprints of global warming on wild  
429 animals and plants. *Nature*, *421*, 57–60. <https://doi.org/10.1038/nature01309.1>.
- 430 Salis, L., Lof, M., van Asch, M., & Visser, M. E. (2016). Modeling winter moth Operophtera  
431 brumata egg phenology: nonlinear effects of temperature and developmental stage on  
432 developmental rate. *Oikos*, *125*(12), 1772–1781. <https://doi.org/10.1111/oik.03257>
- 433 Salis, L., van den Hoorn, E., Beersma, D. G. M., Hut, R. A., & Visser, M. E. (2017).  
434 Photoperiodic cues regulate phenological carry-over effects in an herbivorous insect.  
435 *Functional Ecology*, *32*, 171–180. <https://doi.org/10.1111/1365-2435.12953>
- 436 Sander, K. (1983). The evolution of patterning mechanisms: gleanings from insect  
437 embryogenesis and spermatogenesis. In B. C. Goodwin, N. Holder, & C. C. Wylie  
438 (Eds.), *Development and Evolution* (pp. 137–154). Cambridge University Press.
- 439 Scheffers, B. R., De Meester, L., Bridge, T. C. L., Hoffmann, A. A., Pandolfi, J. M., Corlett,  
440 R. T., ... Watson, J. E. M. (2016). The broad footprint of climate change from genes to  
441 biomes to people. *Science*, *354*(6313). <https://doi.org/10.1126/science.aaf7671>
- 442 Slack, J. M. W. (2003). Phylotype and zootype. In B. K. Hall & W. M. Olson (Eds.),  
443 *Keywords and concepts in evolutionary developmental biology* (pp. 309–318). Harvard  
444 University Press.
- 445 Soto-Padilla, A., Ruijsink, R., Sibon, O. C. M., Van Rijn, H., & Billeter, J. C. (2018).  
446 Thermosensory perception regulates speed of movement in response to temperature  
447 changes in *Drosophila melanogaster*. *Journal of Experimental Biology*, *221*(10).

- 448 <https://doi.org/10.1242/jeb.174151>
- 449 van Asch, M., Salis, L., Holleman, L. J. M., Van Lith, B., & Visser, M. E. (2013).  
450 Evolutionary response of the egg hatching date of a herbivorous insect under climate  
451 change. *Nature Climate Change*, 3, 244–248. <https://doi.org/10.1038/NCLIMATE1717>
- 452 van Asch, M., van Tienderen, P. H., Holleman, L. J. M., & Visser, M. E. (2007). Predicting  
453 adaptation of phenology in response to climate change, an insect herbivore example.  
454 *Global Change Biology*, 13(8), 1596–1604. [https://doi.org/10.1111/j.1365-](https://doi.org/10.1111/j.1365-2486.2007.01400.x)  
455 [2486.2007.01400.x](https://doi.org/10.1111/j.1365-2486.2007.01400.x)
- 456 van Asch, M., & Visser, M. E. (2007). Phenology of Forest Caterpillars and Their Host  
457 Trees: The Importance of Synchrony. *Annu. Rev. Entomol*, 52, 37–55.  
458 <https://doi.org/10.1146/annurev.ento.52.110405.091418>
- 459 Visser, M. E. (2008). Keeping up with a warming world; assessing the rate of adaptation to  
460 climate change. *Proc. R. Soc. B*, 275, 649–659. <https://doi.org/10.1098/rspb.2007.0997>
- 461 Visser, M. E., & Gienapp, P. (2019). Evolutionary and demographic consequences of  
462 phenological mismatches. *Nature Ecology & Evolution*, 12.  
463 <https://doi.org/10.1038/s41559-019-0880-8>
- 464 Wall, C. (1973). Embryonic development in two species of *Chesias* (Lepidoptera  
465 Geometridae). *J. Zool. Lond*, 169, 65–84.
- 466 Wall, C. (1974). Effect of temperature on embryonic development and diapause in *Chesias*  
467 *legatella* (Lepidoptera: Geometridae). *J. Zool. Lond*, 172, 147–168.
- 468

469 **Figures**

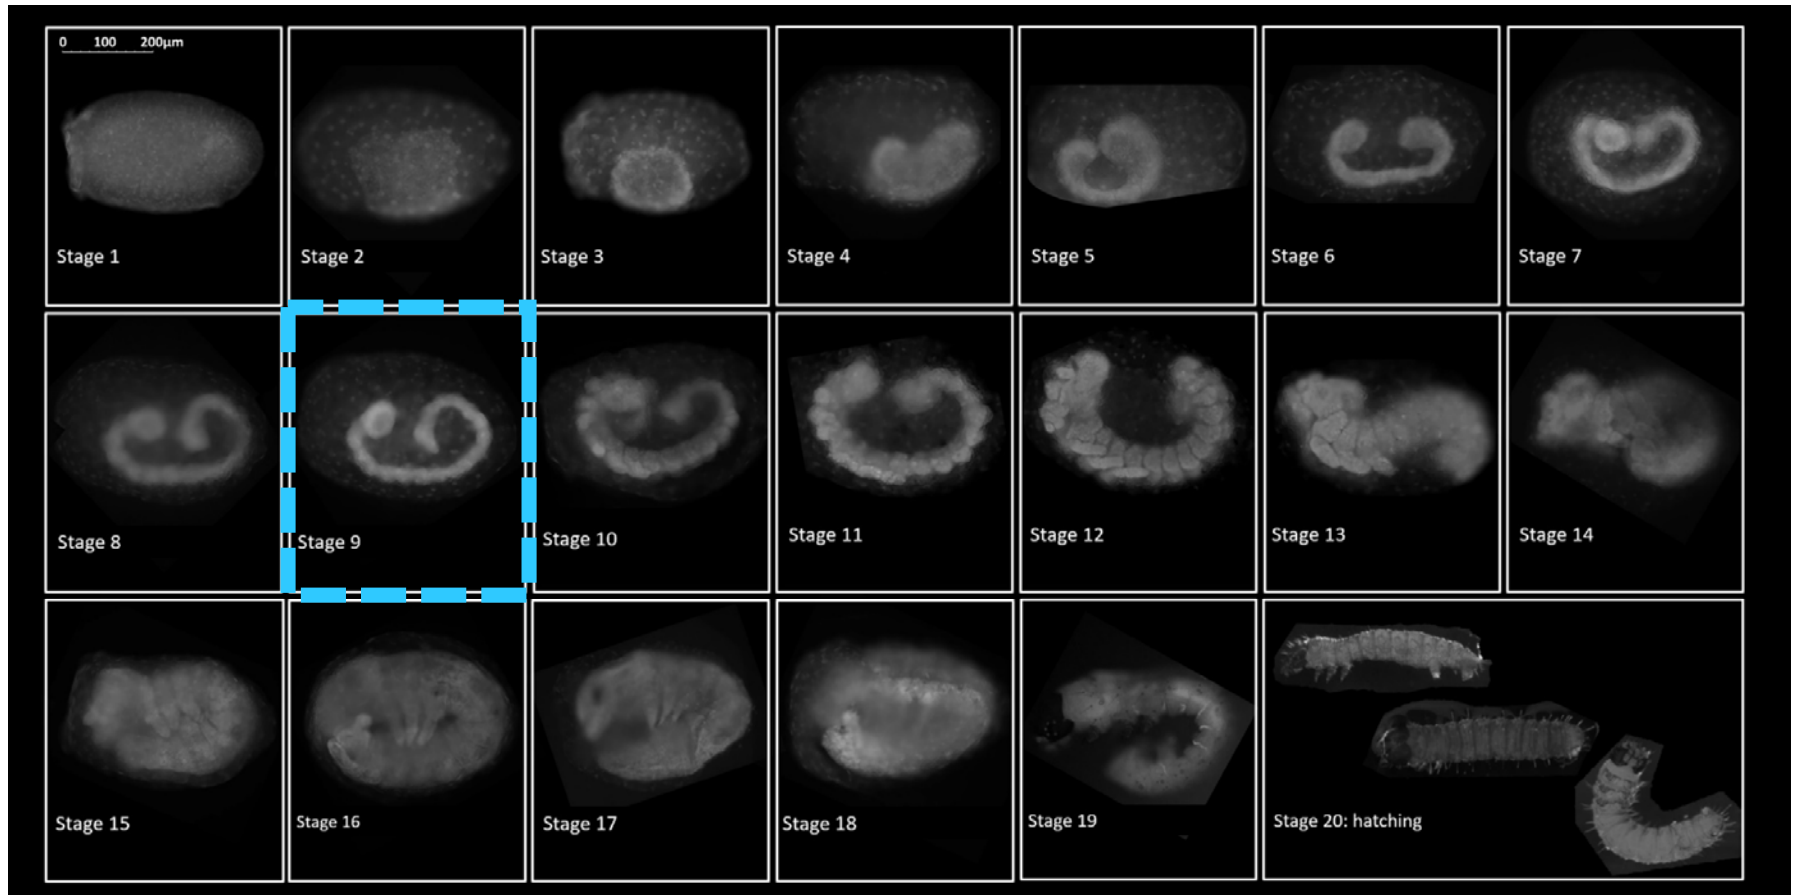

470

471 **Figure 1. Timeline of winter moth embryonic development.** We identified 20 distinct development stages in the winter moth, similar to the  
472 embryonic development timeline of a related Lepidoptera species from the same Geometridae subfamily (Wall, 1973). The fluorescent

473 microscopy images shown are typical representations of each development stage. See main text for a detailed description. In our experiments, we  
474 observed an increase in egg temperature sensitivity after embryos had reached stage 9 in which they finish segmentation and have formed a  
475 rudimentary nervous system.

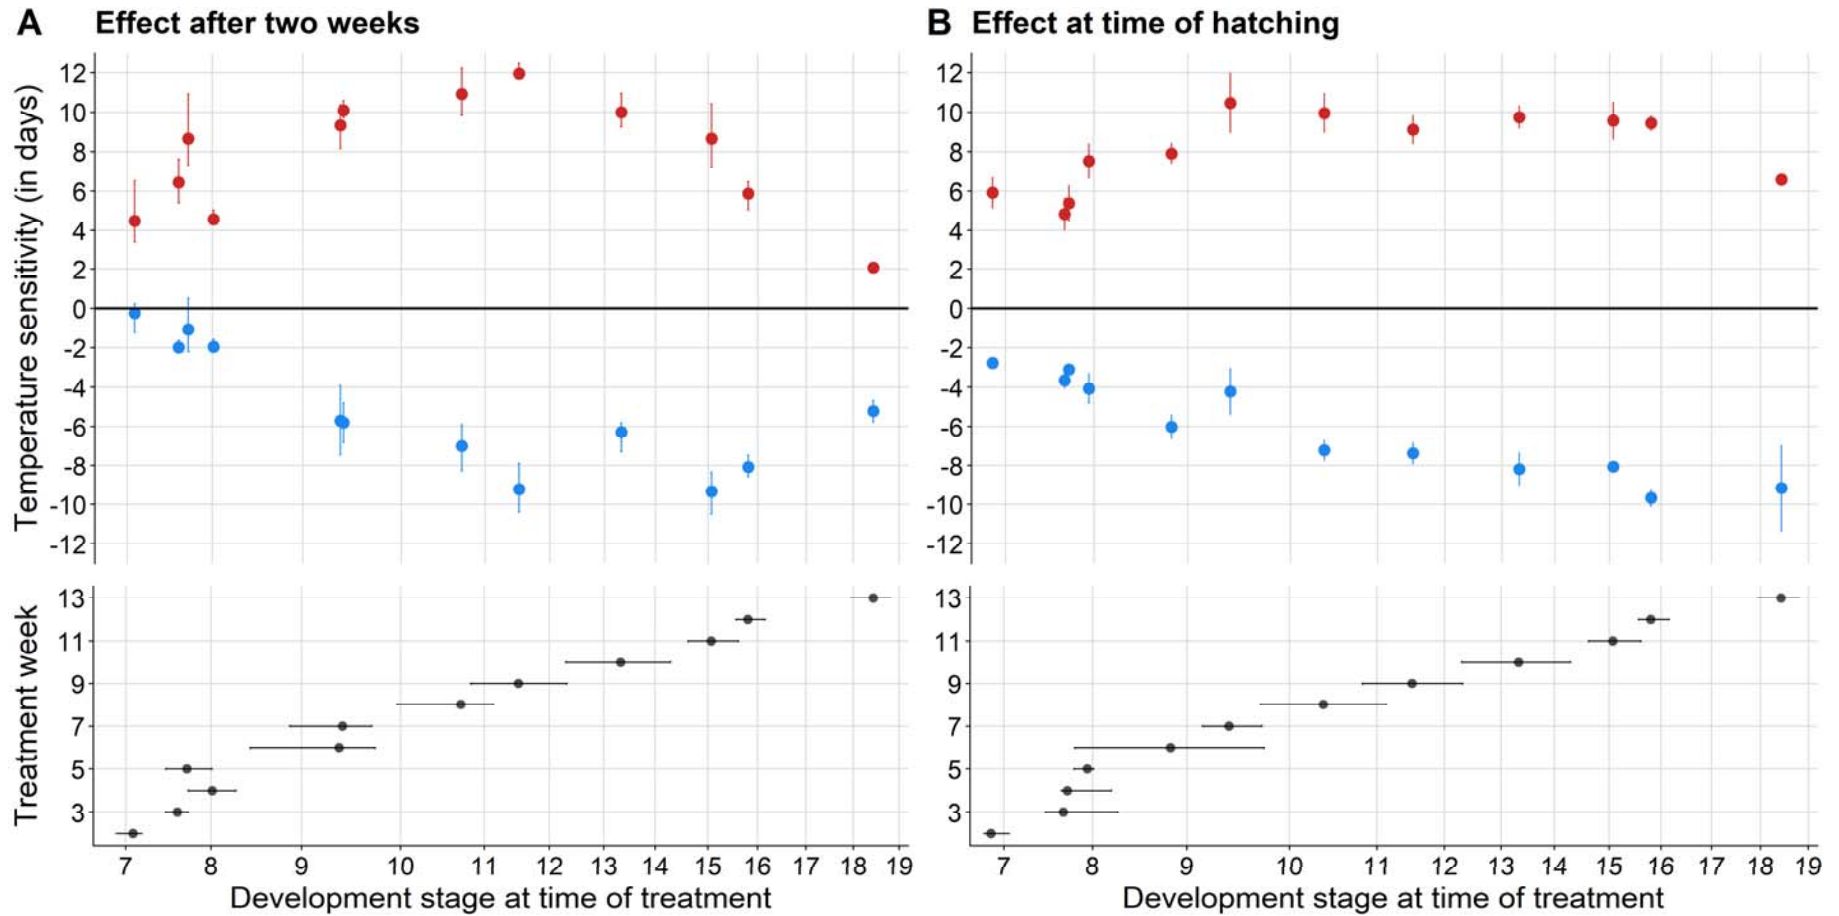

476

477 **Figure 2. Change in winter moth temperature sensitivity during development, measured (A) directly after a two-week temperature**

478 **treatment as development progresses and (B) at timing of hatching.** Temperature sensitivity is expressed in number of days embryos were

479 delayed (blue) or advanced (red) in response to a two-week temperature treatment compared to development at a constant 10°C (zero line), with

480 for (A) medians  $\pm$ IQR and for (B) means  $\pm$ SE. Temperature treatment consisted of two weeks at 5°C (blue) or 15°C (red) at different moments  
481 during development. Lower panels show the median observed development stage  $\pm$ IQR at the start of a treatment for each experiment. X-axis  
482 spacing reflects the relative timing of each development stage at a constant 10°C (Fig.S3). All points have been adjusted for between-clutch  
483 variation (A: N=28 + 48 clutches; B: N=48 clutches). To aid interpretation, effect sizes for developmental progression (A) have been translated  
484 from the observed discrete development stages (Fig.S4) to time units, expressed as the number of days at a constant 10°C, with a loess model  
485 (Fig.S3). For both datasets, comparing effect sizes for the 5°C and 15°C treatments between timepoints shows an increase in temperature  
486 sensitivity after embryos have reached stage 9 in which they finish segmentation (Table S5-8).



## 487 Tables

488 **Table 1. Model output and effect sizes for temperature effect on developmental**  
 489 **progression.** Estimates are expressed in log odds. Estimated mean probabilities and effect  
 490 sizes are expressed as change in log odds, with reference levels in bold. In 2018-2019,  
 491 treatments were given in weeks 2-8 from the start of the experiment (blue rows, N=28  
 492 clutches). In 2019-2020, eggs were sampled weekly (=before), but treatment was only  
 493 administered in weeks 9-13 (orange rows, N=48 clutches). As we observed winter moth  
 494 embryos from 18 different developmental stages in the experiment (stage 2, 3, 5-20), the  
 495 model includes 17 intercepts that denote the thresholds between these developmental stages.  
 496 Asterisks denote significant within-week comparisons. See for full model output Tables S1  
 497 and S3.

| Model parameter            | Estimate           | Estimated mean prob. | Effect size, *P<0.05 |           |            |
|----------------------------|--------------------|----------------------|----------------------|-----------|------------|
|                            |                    |                      | in log odds          | 5 vs. 10C | 15 vs. 10C |
| <b>Treat_week2: before</b> | <b>=intercepts</b> |                      |                      |           |            |
| 5                          | <b>1.86</b>        | <b>+1.86</b>         | -0.34                |           |            |
| 10                         | <b>2.20</b>        | <b>+2.20</b>         |                      | +1.02*    |            |
| 15                         | <b>3.22</b>        | <b>+3.22</b>         |                      |           | +1.36*     |
| Treat_week3: <b>before</b> | <b>1.85</b>        | <b>+1.85</b>         |                      |           |            |
| 5                          | -1.49              | +2.22                | -0.37                |           |            |
| 10                         | -1.46              | +2.59                |                      | +1.80*    |            |
| 15                         | -0.68              | +4.39                |                      |           | +2.17*     |
| Treat_week4: <b>before</b> | <b>2.51</b>        | <b>+2.51</b>         |                      |           |            |
| 5                          | -1.13              | +3.24                | -0.39                |           |            |
| 10                         | -1.09              | +3.62                |                      | +0.91*    |            |
| 15                         | -1.19              | +5.54                |                      |           | +1.30*     |
| Treat_week5: <b>before</b> | <b>1.63</b>        | <b>+1.63</b>         |                      |           |            |
| 5                          | 0.65               | +4.14                | +0.42                |           |            |
| 10                         | -0.12              | +3.71                |                      | +2.70*    |            |
| 15                         | 1.57               | +6.42                |                      |           | +2.28*     |
| Treat_week6: <b>before</b> | <b>4.27</b>        | <b>+4.27</b>         |                      |           |            |
| 5                          | 0.33               | +6.46                | -1.31*               |           |            |
| 10                         | 1.30               | +7.77                |                      | +2.12*    |            |
| 15                         | 2.40               | +9.89                |                      |           | +3.43*     |

|                             |              |               |        |         |         |
|-----------------------------|--------------|---------------|--------|---------|---------|
| Treat_week7: <b>before</b>  | <b>4.88</b>  | <b>+4.88</b>  |        |         |         |
| 5                           | 0.04         | +6.78         | -1.37* |         |         |
| 10                          | 1.07         | +8.15         |        | +2.56*  |         |
| 15                          | 2.62         | +10.72        |        |         | +3.93*  |
| Treat_week8: <b>before</b>  | <b>7.41</b>  | <b>+7.41</b>  |        |         |         |
| 5                           | -0.77        | +8.50         | -1.13* |         |         |
| 10                          | 0.01         | +9.62         |        | +2.69*  |         |
| 15                          | 1.68         | +12.31        |        |         | +3.81*  |
| Treat_week9: <b>before</b>  | <b>8.71</b>  | <b>+8.78</b>  |        |         |         |
| 5                           | -0.77        | +9.87         | -1.97* |         |         |
| 10                          | 0.86         | +11.84        |        | +2.38*  |         |
| 15                          | 2.23         | +14.23        |        |         | +4.35*  |
| Treat_week10: <b>before</b> | <b>10.67</b> | <b>+10.74</b> |        |         |         |
| 5                           | -0.38        | +12.22        | -1.22* |         |         |
| 10                          | 0.49         | +13.43        |        | +3.01*  |         |
| 15                          | 2.49         | +16.45        |        |         | +4.23*  |
| Treat_week11: <b>before</b> | <b>12.31</b> | <b>+12.38</b> |        |         |         |
| 5                           | -2.02        | +12.22        | -2.18* |         |         |
| 10                          | -0.17        | +14.41        |        | +4.25*  |         |
| 15                          | 3.06         | +18.66        |        |         | +6.44*  |
| Treat_week12: <b>before</b> | <b>12.83</b> | <b>+12.90</b> |        |         |         |
| 5                           | -1.09        | +13.67        | -2.46* |         |         |
| 10                          | 1.03         | +16.13        |        | +3.18*  |         |
| 15                          | 3.19         | +19.31        |        |         | +5.64*  |
| Treat_week13: <b>before</b> | <b>15.65</b> | <b>+15.72</b> |        |         |         |
| 5                           | -1.13        | +16.45        | -2.31* |         |         |
| 10                          | 0.84         | +18.76        |        | +10.78* |         |
| 15                          | 10.60        | +29.54        |        |         | +13.09* |

498

499 **Table 2. Model output and effect sizes for temperature effect on timing of hatching.**

500 Estimates and estimated means are expressed in April days, with reference levels in bold.

501 Negative estimated means indicate that clutches hatched before April 1<sup>st</sup>. Effect sizes are

502 expressed in days, with negative numbers meaning an advance in timing and positive

503 numbers a delay. Asterisks denote significant within-week comparisons. See for full model

504 output Tables S2 and S4.

| Model parameter | Estimate  | Estimated mean hatch date | Effect size, *P<0.05 |           |            |           |
|-----------------|-----------|---------------------------|----------------------|-----------|------------|-----------|
|                 |           |                           | in April days        | 5 vs. 10C | 15 vs. 10C | 15 vs. 5C |
| Treat_week2:    | <b>10</b> | <b>-10.19</b>             | <b>-10.19</b>        | 2.42*     |            |           |
|                 | 5         | <b>2.43</b>               | <b>-7.76</b>         |           | -6.49*     |           |
|                 | 15        | <b>-6.49</b>              | <b>-16.68</b>        |           |            | -8.92*    |
| Treat_week3:    | <b>10</b> | <b>-5.81</b>              | -16.00               | 3.82*     |            |           |
|                 | 5         | 1.40                      | -12.17               |           | -4.40*     |           |
|                 | 15        | 2.10                      | -20.39               |           |            | -8.22*    |
| Treat_week4:    | <b>10</b> | <b>-2.66</b>              | -12.85               | 2.87*     |            |           |
|                 | 5         | 0.45                      | -9.97                |           | -5.72*     |           |
|                 | 15        | 0.78                      | -18.56               |           |            | -8.59*    |
| Treat_week5:    | <b>10</b> | <b>4.47</b>               | -5.72                | 3.47*     |            |           |
|                 | 5         | 1.04                      | 0.35                 |           | -8.21*     |           |
|                 | 15        | -1.72                     | -13.93               |           |            | -11.68*   |
| Treat_week6:    | <b>10</b> | <b>3.79</b>               | -6.40                | 6.07*     |            |           |
|                 | 5         | 3.64                      | -0.33                |           | -8.07*     |           |
|                 | 15        | -1.58                     | -14.47               |           |            | -14.14*   |
| Treat_week7:    | <b>10</b> | <b>4.13</b>               | -6.06                | 3.01*     |            |           |
|                 | 5         | 0.58                      | -3.05                |           | -11.91*    |           |
|                 | 15        | -5.42                     | -16.64               |           |            | -14.92*   |
| Treat_week8:    | <b>10</b> | <b>1.90</b>               | -8.29                | 7.15*     |            |           |
|                 | 5         | 4.73                      | -1.13                |           | -10.58*    |           |
|                 | 15        | -4.09                     | -18.87               |           |            | -17.74*   |
| Treat_week9:    | <b>10</b> | <b>1.37</b>               | -8.82                | 7.67*     |            |           |
|                 | 5         | 5.24                      | 0.09                 |           | -9.19*     |           |
|                 | 15        | -2.70                     | -18.01               |           |            | -16.86*   |
| Treat_week10:   | <b>10</b> | <b>-0.39</b>              | -10.58               | 8.91*     |            |           |
|                 | 5         | 6.48                      | -1.67                |           | -9.39*     |           |
|                 | 15        | -2.90                     | -19.97               |           |            | -18.30*   |
| Treat_week11:   | <b>10</b> | <b>3.06</b>               | -7.13                | 8.48*     |            |           |
|                 | 5         | 6.05                      | 1.35                 |           | -9.53*     |           |
|                 | 15        | -3.04                     | -16.66               |           |            | -18.00*   |

|                         |             |        |        |        |         |
|-------------------------|-------------|--------|--------|--------|---------|
| Treat_week12: <b>10</b> | <b>5.09</b> | -5.10  | 10.64* |        |         |
| 5                       | 8.22        | 5.55   |        | -8.81* |         |
| 15                      | -2.31       | -13.90 |        |        | -19.45* |
| Treat_week13: <b>10</b> | <b>1.08</b> | -9.11  | 11.20* |        |         |
| 5                       | 8.77        | 2.09   |        | -4.95* |         |
| 15                      | 1.54        | -14.06 |        |        | -16.14* |

505
